# Supplementary material
Source: PubMed Central journal article supplement (PMC9888275)
Supplement: aem.01878-22-s0001.pdf [file aem.01878-22-s0001.pdf]

## **Supplemental Materials**

### **Alteration of chain-length selectivity and thermostability of *Rhizopus oryzae* lipase via virtual saturation mutagenesis coupled with disulfide bond design**

Jinsha Huang, Shuhan Dai, Xiyang Chen, Li Xu\*, Jinyong Yan, Min  
Yang, Yunjun Yan\*

Key Laboratory of Molecular Biophysics, Ministry of Education, College of Life  
Science and Technology, Huazhong University of Science and Technology, Wuhan,  
People's Republic of China

\*Corresponding authors:

Li Xu, xuli@hust.edu.cn; Yunjun Yan, yanyunjun@hust.edu.cn;

## Table of Contents

**Table S1** Binding/folding free energy change of ROL variants predicted by Cartesian\_ddg with a virtual scan

**Table S2** Prediction, assessment, and visualization of potential residue pairs of disulfide bonds

**Table S3** Quantitative detection of disulfide bonds

**Table S4** Specific activity of WT and mutant ROL in measuring enzymatic properties

**Table S5** Studies on the activity and/or thermostability of fungal lipases

**Fig. S1** Model and evaluation of ROL in open conformation (OROL). (A) Multiple sequence alignments of target sequence, lid region of RML in open conformation (PDB ID: 4tgl, residues 82–95) and closed conformation of ROL without lid region (PDB ID: 1lgy, residues 1–82 and 97–269). The alignments were conducted using the PROMALS3D server and visualized using Jalview, with coloring based on the percentage identity. Ramachandran plot analysis of targeted OROL from (B) MolProbity and (C) PROCHECK.

**Fig. S2** (A) SDS-PAGE image of purified variants based on Cartesian\_ddg using 12% separation gel and 5% stacking gel. (B) Melting temperature changes ( $\Delta T_m$ ) of purified variants based on Cartesian\_ddg measured by differential scanning fluorimetry. The red bar represents stable candidates with positive  $\Delta T_m$  value and the blue one represents unstable candidates with negative  $\Delta T_m$  value.

**Fig. S3** Presentation of disulfide bonds of mutant M6 with the catalytic triad as spheres in cyan. The designed disulfide bonds were as sticks in green and the native disulfide

bonds were as sticks in magenta.

**Fig. S4** SDS-PAGE image of disulfide bond mutants using 12% separation gel and 5% stacking gel. (M: marker; 1: WT; 2: E265V/S267W; 3: E265V/S267W/E190C-E238C; 4: E265V/S267W/S61C-S115C; 5: M6).

**Fig. S5** 2D diagrams of enzyme–substrate interactions of five bound ligands generated by LigPlot+, and plot of variant E265V/S267W automatically fitted to WT. The ligands are: C8, C10, C12, C14, and C16.

**Table S1** Binding/folding free energy changes of ROL variants predicted by

Cartesian\_ddg with a virtual scan

| Mutation     | Binding free energy change (kcal/mol) <sup>a</sup> |                   |                   |                   |                   | Folding free energy change (kcal/mol) <sup>a</sup> |
|--------------|----------------------------------------------------|-------------------|-------------------|-------------------|-------------------|----------------------------------------------------|
|              | C8                                                 | C10               | C12               | C14               | C16               | Thermostability                                    |
| P178C        | -0.1 ± 0.0                                         | -0.8 ± 0.0        | 0.0 ± 0.0         | -0.4 ± 0.0        | -0.2 ± 0.0        | 5.5 ± 0.0                                          |
| P178L        | -0.3 ± 0.0                                         | -0.8 ± 0.0        | -0.1 ± 0.0        | -1.2 ± 0.0        | -0.4 ± 0.0        | 3.2 ± 0.0                                          |
| P178T        | -0.2 ± 0.0                                         | -0.7 ± 0.0        | -0.2 ± 0.0        | -0.3 ± 0.0        | -0.1 ± 0.0        | 5.0 ± 0.0                                          |
| P211C        | 0.0 ± 0.0                                          | 0.0 ± 0.0         | -0.2 ± 0.0        | -1.1 ± 0.0        | -1.1 ± 0.1        | 5.3 ± 0.0                                          |
| P211F        | -0.2 ± 0.0                                         | -0.3 ± 0.0        | -0.4 ± 0.0        | -3.7 ± 0.0        | -1.5 ± 0.0        | 1.0 ± 0.0                                          |
| P211H        | -0.1 ± 0.0                                         | -0.1 ± 0.0        | -0.2 ± 0.0        | -0.4 ± 0.0        | -0.3 ± 0.0        | 1.6 ± 0.0                                          |
| P211I        | 0.0 ± 0.0                                          | 0.0 ± 0.0         | 0.0 ± 0.0         | -1.6 ± 0.0        | -1.3 ± 0.0        | 5.5 ± 0.0                                          |
| P211K        | 0.0 ± 0.0                                          | 0.0 ± 0.0         | -0.1 ± 0.0        | -0.3 ± 0.0        | -0.2 ± 0.0        | 3.4 ± 0.0                                          |
| P211L        | 0.0 ± 0.0                                          | 0.0 ± 0.0         | -0.2 ± 0.0        | -1.3 ± 0.0        | -2.6 ± 0.5        | 2.4 ± 0.0                                          |
| P211M        | -0.1 ± 0.0                                         | -0.1 ± 0.0        | -0.1 ± 0.0        | -1.2 ± 0.0        | -1.8 ± 0.0        | 3.3 ± 0.0                                          |
| P211Q        | -0.1 ± 0.0                                         | -0.1 ± 0.0        | -0.2 ± 0.0        | -0.8 ± 0.0        | -1.2 ± 0.0        | 3.6 ± 0.0                                          |
| P211R        | -0.1 ± 0.0                                         | -0.1 ± 0.0        | -0.1 ± 0.0        | -0.6 ± 0.0        | -0.6 ± 0.0        | 4.2 ± 0.0                                          |
| <b>P211W</b> | <b>-0.2 ± 0.0</b>                                  | <b>-0.3 ± 0.0</b> | <b>-0.3 ± 0.0</b> | <b>-3.2 ± 0.0</b> | <b>-2.3 ± 0.0</b> | <b>-0.6 ± 0.0</b>                                  |
| P211Y        | -0.2 ± 0.0                                         | -0.3 ± 0.0        | -0.4 ± 0.0        | -3.2 ± 0.0        | -1.8 ± 0.0        | 0.5 ± 0.0                                          |
| I254L        | -0.4 ± 0.0                                         | -0.9 ± 0.0        | -1.1 ± 0.0        | -0.7 ± 0.0        | -1.4 ± 0.0        | 2.5 ± 0.0                                          |
| <b>L258F</b> | <b>-4.5 ± 0.0</b>                                  | <b>-2.3 ± 0.0</b> | <b>-1.8 ± 0.0</b> | <b>-2.6 ± 0.0</b> | <b>-2.6 ± 0.0</b> | <b>-1.1 ± 0.1</b>                                  |
| <b>L258Y</b> | <b>-4.2 ± 0.0</b>                                  | <b>-2.2 ± 0.0</b> | <b>-0.7 ± 0.0</b> | <b>-1.7 ± 0.0</b> | <b>-2.6 ± 0.0</b> | <b>-0.7 ± 0.1</b>                                  |
| S259P        | -0.4 ± 0.0                                         | -0.5 ± 0.0        | -0.3 ± 0.0        | -0.2 ± 0.0        | -0.4 ± 0.0        | 8.4 ± 0.1                                          |
| <b>E265A</b> | <b>-1.1 ± 0.3</b>                                  | <b>-1.2 ± 0.0</b> | <b>-0.2 ± 0.0</b> | <b>-1.2 ± 0.1</b> | <b>-0.8 ± 0.0</b> | <b>-3.1 ± 0.2</b>                                  |
| <b>E265C</b> | <b>-0.1 ± 0.0</b>                                  | <b>-1.1 ± 0.0</b> | <b>-0.1 ± 0.0</b> | <b>-0.9 ± 0.1</b> | <b>-0.7 ± 0.0</b> | <b>-4.6 ± 0.2</b>                                  |
| <b>E265D</b> | <b>-0.2 ± 0.0</b>                                  | <b>-0.9 ± 0.0</b> | <b>-0.3 ± 0.0</b> | <b>-1.0 ± 0.1</b> | <b>-0.2 ± 0.0</b> | <b>-0.7 ± 0.0</b>                                  |
| <b>E265F</b> | <b>-0.6 ± 0.3</b>                                  | <b>-0.6 ± 0.0</b> | <b>-0.1 ± 0.0</b> | <b>-0.8 ± 0.1</b> | <b>-0.2 ± 0.0</b> | <b>-15.7 ± 0.1</b>                                 |
| E265G        | -0.4 ± 0.5                                         | -2.7 ± 0.0        | -7.5 ± 0.0        | -1.5 ± 0.0        | -4.5 ± 0.0        | 3.8 ± 0.2                                          |

|              |                   |                   |                   |                   |                   |                    |
|--------------|-------------------|-------------------|-------------------|-------------------|-------------------|--------------------|
| <b>E265H</b> | <b>-0.2 ± 0.0</b> | <b>-0.8 ± 0.0</b> | <b>-0.1 ± 0.0</b> | <b>-1.1 ± 0.1</b> | <b>-0.2 ± 0.0</b> | <b>-8.4 ± 0.2</b>  |
| <b>E265N</b> | <b>-0.2 ± 0.0</b> | <b>-1.0 ± 0.0</b> | <b>-0.1 ± 0.0</b> | <b>-1.1 ± 0.1</b> | <b>-0.4 ± 0.0</b> | <b>-4.3 ± 0.1</b>  |
| <b>E265P</b> | <b>-0.8 ± 0.1</b> | <b>-2.0 ± 0.0</b> | <b>-2.0 ± 0.0</b> | <b>-1.9 ± 0.1</b> | <b>-1.4 ± 0.0</b> | <b>-1.8 ± 0.1</b>  |
| <b>E265V</b> | <b>-1.2 ± 0.0</b> | <b>-0.8 ± 0.0</b> | <b>-0.3 ± 0.0</b> | <b>-0.2 ± 0.0</b> | <b>-0.3 ± 0.0</b> | <b>-8.0 ± 0.0</b>  |
| <b>E265W</b> | <b>-1.0 ± 0.7</b> | <b>-0.9 ± 0.0</b> | <b>-0.1 ± 0.0</b> | <b>-1.1 ± 0.1</b> | <b>-0.6 ± 0.0</b> | <b>-3.8 ± 0.2</b>  |
| <b>E265Y</b> | <b>-0.5 ± 0.0</b> | <b>-0.8 ± 0.0</b> | <b>-0.2 ± 0.0</b> | <b>-1.0 ± 0.1</b> | <b>-0.5 ± 0.0</b> | <b>-11.5 ± 0.2</b> |
| G266H        | -2.8 ± 0.0        | -0.1 ± 0.0        | -0.9 ± 0.0        | -2.9 ± 0.0        | -2.4 ± 0.0        | 9.4 ± 0.0          |
| G266K        | -2.9 ± 0.0        | -5.1 ± 0.0        | -5.4 ± 0.0        | -2.7 ± 0.0        | -0.2 ± 0.0        | 10.9 ± 0.0         |
| G266R        | -4.2 ± 0.1        | -5.0 ± 0.0        | -3.2 ± 0.4        | -2.3 ± 0.0        | -3.8 ± 0.0        | 13.7 ± 0.0         |
| G266W        | -2.3 ± 0.0        | -3.1 ± 0.0        | -4.1 ± 0.0        | -0.3 ± 0.0        | -2.5 ± 0.0        | 11.2 ± 1.7         |
| S267C        | 0.0 ± 0.0         | -0.1 ± 0.0        | -0.2 ± 0.0        | -0.1 ± 0.0        | 0.0 ± 0.0         | 1.0 ± 0.0          |
| S267I        | -0.1 ± 0.0        | -0.2 ± 0.0        | -0.6 ± 0.0        | -0.2 ± 0.0        | -0.1 ± 0.0        | 3.3 ± 0.0          |
| <b>S267L</b> | <b>0.0 ± 0.0</b>  | <b>-0.1 ± 0.0</b> | <b>-0.5 ± 0.0</b> | <b>-0.2 ± 0.0</b> | <b>-0.1 ± 0.0</b> | <b>-1.7 ± 0.0</b>  |
| S267P        | -0.1 ± 0.0        | -0.2 ± 0.0        | -1.7 ± 0.1        | -0.6 ± 0.0        | -0.3 ± 0.0        | 10.6 ± 0.0.        |
| <b>S267T</b> | <b>0.0 ± 0.0</b>  | <b>-0.1 ± 0.0</b> | <b>-0.2 ± 0.0</b> | <b>-0.1 ± 0.0</b> | <b>-0.1 ± 0.0</b> | <b>-0.2 ± 0.0</b>  |
| S267V        | -0.1 ± 0.0        | -0.2 ± 0.0        | -0.4 ± 0.0        | -0.2 ± 0.0        | -0.1 ± 0.0        | 0.5 ± 0.0          |
| <b>S267W</b> | <b>-2.1 ± 0.0</b> | <b>-0.6 ± 0.0</b> | <b>-2.9 ± 0.0</b> | <b>-0.2 ± 0.0</b> | <b>-1.0 ± 0.0</b> | <b>-2.0 ± 0.0</b>  |
| <b>S267Y</b> | <b>-2.6 ± 0.0</b> | <b>-0.7 ± 0.0</b> | <b>-3.2 ± 0.0</b> | <b>-0.4 ± 0.0</b> | <b>-0.3 ± 0.0</b> | <b>-2.1 ± 0.0</b>  |

---

<sup>a</sup>Mean ± standard deviation

**Table S2** Prediction, assessment, and visualization of potential residue pairs of disulfide bonds.

| <b>Disulfide bond</b> | <b>Predicted by<sup>a</sup></b> | <b>FoldX (kcal/mol)<sup>b</sup></b> | <b>Visual inspection</b> | <b>Disulfide bond</b> | <b>Predicted by<sup>a</sup></b> | <b>FoldX (kcal/mol)<sup>b</sup></b> | <b>Visual inspection</b> |
|-----------------------|---------------------------------|-------------------------------------|--------------------------|-----------------------|---------------------------------|-------------------------------------|--------------------------|
| 10-13                 | 3                               | 0.7 ± 0.2                           | /                        | 241-243               | 1/2                             | -1.3 ± 0.1                          | Failed                   |
| 100-106               | 1/2/3                           | 5.3 ± 0.1                           | /                        | 25-42                 | 3                               | 2.8 ± 0.1                           | /                        |
| 100-108               | 3                               | 5.4 ± 0.1                           | /                        | 26-42                 | 3                               | 3.0 ± 0.0                           | /                        |
| 103-106               | 1/2/3                           | 0.8 ± 0.0                           | /                        | 264-269               | 1/2/3                           | 0.4 ± 0.0                           | /                        |
| 105-184               | 2                               | 3.2 ± 0.0                           | /                        | 31-35                 | 3                               | 5.8 ± 0.1                           | /                        |
| 106-184               | 1/3                             | 0.9 ± 0.1                           | /                        | 33-55                 | 1/3                             | 1.7 ± 0.2                           | /                        |
| 133-134               | 1                               | 1.9 ± 0.0                           | /                        | 47-50                 | 3                               | 4.9 ± 1.4                           | /                        |
| 134-137               | 1/3                             | 4.6 ± 0.4                           | /                        | 49-72                 | 1                               | 2.8 ± 0.0                           | /                        |
| 138-169               | 1                               | 1.9 ± 0.0                           | /                        | 50-68                 | 3                               | 4.9 ± 0.0                           | /                        |
| 140-171               | 3                               | 2.2 ± 0.2                           | /                        | 53-67                 | 1/2                             | 4.7 ± 0.0                           | /                        |
| 141-155               | 3                               | 5.4 ± 0.5                           | /                        | 55-66                 | 1                               | 4.1 ± 0.0                           | /                        |
| 160-161               | 1                               | 3.6 ± 0.5                           | /                        | 58-118                | 3                               | -0.8 ± 0.1                          | Failed                   |
| 165-170               | 1                               | 7.3 ± 0.1                           | /                        | 58-119                | 3                               | -0.2 ± 0.2                          | Failed                   |
| 167-193               | 2                               | 5.9 ± 0.0                           | /                        | 58-63                 | 1/2                             | -1.7 ± 0.1                          | Failed                   |
| 168-169               | 1                               | 1.8 ± 0.0                           | /                        | 61-115                | 1/3                             | -0.9 ± 0.4                          | Passed                   |
| 172-141               | 3                               | 6.5 ± 0.0                           | /                        | 61-63                 | 1                               | 0.5 ± 1.0                           | /                        |
| 172-155               | 3                               | 1.7 ± 0.0                           | /                        | 6-243                 | 3                               | 0.3 ± 0.1                           | /                        |
| 172-196               | 1                               | 7.7 ± 0.1                           | /                        | 63-115                | 1                               | -0.1 ± 0.2                          | Failed                   |
| 18-261                | 1                               | 4.9 ± 0.0                           | /                        | 64-57                 | 3                               | -0.7 ± 0.2                          | Failed                   |
| 183-217               | 3                               | 4.5 ± 0.0                           | /                        | 66-33                 | 3                               | 6.0 ± 0.0                           | /                        |
| 188-103               | 3                               | 4.6 ± 0.1                           | /                        | 68-77                 | 1                               | 6.8 ± 0.1                           | /                        |
| 189-219               | 1/2                             | 4.8 ± 0.1                           | /                        | 73-75                 | 1                               | -0.1 ± 0.1                          | Failed                   |
| 190-238               | 1/2/3                           | -3.5 ± 0.6                          | Passed                   | 74-137                | 1                               | 5.3 ± 0.5                           | /                        |
| 192-194               | 1                               | 4.4 ± 0.2                           | /                        | 75-138                | 3                               | 0.2 ± 0.0                           | /                        |
| 199-223               | 3                               | 0.3 ± 0.3                           | /                        | 78-141                | 1                               | 5.9 ± 0.1                           | /                        |
| 20-173                | 1/2                             | 5.7 ± 0.3                           | /                        | 79-27                 | 3                               | 2.4 ± 0.1                           | /                        |

|         |       |           |   |                |              |            |   |
|---------|-------|-----------|---|----------------|--------------|------------|---|
| 219-190 | 3     | 2.4 ± 0.1 | / | 79-66          | 3            | 6.1 ± 0.0  | / |
| 220-196 | 3     | 4.7 ± 0.4 | / | 80-150         | 1/3          | 4.7 ± 0.0  | / |
| 22-46   | 3     | 1.6 ± 0.2 | / | 80-65          | 3            | 12.3 ± 1.1 | / |
| 226-231 | 3     | 2.1 ± 0.0 | / | 97-107         | 1            | 3.4 ± 0.1  | / |
| 227-231 | 1/2/3 | 0.5 ± 0.0 | / | 98-110         | 1/2          | 0.2 ± 0.0  | / |
| 228-229 | 2     | 1.3 ± 0.1 | / | 210-95         | 3            | /          | / |
| 9-13    | 1/3   | /         | / | 21-175         | 1/3          | /          | / |
| 106-185 | 1/2   | /         | / | 21-260         | 1/2          | /          | / |
| 107-182 | 1     | /         | / | 218-240        | 1/3          | /          | / |
| 108-113 | 3     | /         | / | 219-186        | 3            | /          | / |
| 108-180 | 3     | /         | / | 222-235        | 1            | /          | / |
| 109-112 | 1/3   | /         | / | 224-244        | 1/2          | /          | / |
| 112-149 | 1/2   | /         | / | 232-9          | 3            | /          | / |
| 119-56  | 3     | /         | / | 235-222        | 3            | /          | / |
| 137-74  | 3     | /         | / | 235-241        | 1/3          | /          | / |
| 141-151 | 1/3   | /         | / | <b>235-244</b> | <b>1/2/3</b> | /          | / |
| 141-78  | 3     | /         | / | 24-144         | 1/2          | /          | / |
| 142-173 | 1/3   | /         | / | 243-235        | 3            | /          | / |
| 142-24  | 3     | /         | / | 244-224        | 3            | /          | / |
| 142-79  | 3     | /         | / | 252-205        | 3            | /          | / |
| 143-147 | 3     | /         | / | 256-203        | 3            | /          | / |
| 144-145 | 1     | /         | / | 256-253        | 3            | /          | / |
| 144-147 | 3     | /         | / | 260-175        | 3            | /          | / |
| 144-176 | 3     | /         | / | 260-21         | 3            | /          | / |
| 147-81  | 3     | /         | / | 260-265        | 3            | /          | / |
| 148-174 | 3     | /         | / | 261-18         | 3            | /          | / |
| 148-177 | 3     | /         | / | 26-43          | 3            | /          | / |
| 149-112 | 3     | /         | / | 265-144        | 3            | /          | / |
| 151-143 | 3     | /         | / | 27-81          | 1/3          | /          | / |
| 151-174 | 3     | /         | / | <b>29-268</b>  | <b>1/2/3</b> | /          | / |

|         |     |   |   |              |              |   |   |
|---------|-----|---|---|--------------|--------------|---|---|
| 174-177 | 2/3 | / | / | 29-32        | 1            | / | / |
| 175-144 | 3   | / | / | 29-40        | 3            | / | / |
| 175-199 | 1/3 | / | / | 32-29        | 3            | / | / |
| 176-145 | 3   | / | / | 38-50        | 3            | / | / |
| 179-216 | 1/2 | / | / | <b>40-43</b> | <b>1/2/3</b> | / | / |
| 179-218 | 3   | / | / | 43-38        | 3            | / | / |
| 180-149 | 3   | / | / | 43-44        | 1            | / | / |
| 181-108 | 3   | / | / | 47-70        | 3            | / | / |
| 182-107 | 3   | / | / | 56-122       | 1/2/3        | / | / |
| 184-105 | 3   | / | / | 62-83        | 1            | / | / |
| 185-106 | 3   | / | / | 63-58        | 3            | / | / |
| 185-181 | 3   | / | / | 66-55        | 3            | / | / |
| 186-217 | 1   | / | / | 70-73        | 1/2/3        | / | / |
| 186-219 | 1   | / | / | 70-75        | 3            | / | / |
| 196-172 | 3   | / | / | 72-49        | 3            | / | / |
| 198-220 | 3   | / | / | 80-143       | 2/3          | / | / |
| 200-207 | 1/3 | / | / | 80-147       | 2/3          | / | / |
| 201-225 | 1/2 | / | / | 81-64        | 3            | / | / |
| 201-260 | 3   | / | / | 82-146       | 3            | / | / |
| 20-142  | 3   | / | / | 83-89        | 3            | / | / |
| 202-203 | 1   | / | / | 85-88        | 1/3          | / | / |
| 202-256 | 1   | / | / | 9-232        | 1/2          | / | / |
| 203-253 | 1   | / | / | 9-234        | 3            | / | / |
| 204-256 | 1/2 | / | / | 95-210       | 1            | / | / |
| 204-257 | 1/3 | / | / | 96-110       | 3            | / | / |
| 210-216 | 1/3 | / | / |              |              |   |   |

<sup>a</sup> 1, MODIP; 2, DbD2; 3, BridgeD

<sup>b</sup>Mean ± standard deviation

Natural disulfide bonds are shown in bold italics.



**Table S3** Quantitative detection of disulfide bonds

| Sample                         | Free thiol/protein(mol/mol) <sup>a</sup> |           | Total number<br>of free cysteines | Deduced number<br>of disulfide bonds |
|--------------------------------|------------------------------------------|-----------|-----------------------------------|--------------------------------------|
|                                | -DTT                                     | +DTT      |                                   |                                      |
| <b>WT</b>                      | 0.1 ± 0.1                                | 6.2 ± 0.6 | 0                                 | 3                                    |
| <b>E265V/S267W</b>             | 0.0 ± 0.1                                | 5.9 ± 0.3 | 0                                 | 3                                    |
| <b>E265V/S267W/S61C-S115C</b>  | 0.1 ± 0.1                                | 8.2 ± 0.3 | 0                                 | 4                                    |
| <b>E265V/S267W/E190C-E238C</b> | 0.0 ± 0.1                                | 7.8 ± 0.3 | 0                                 | 4                                    |
| <b>M6</b>                      | 0.1 ± 0.1                                | 9.8 ± 0.6 | 0                                 | 5                                    |

<sup>a</sup>Mean ± standard deviation

**Table S4** Specific activity of WT and mutant ROL in measuring enzymatic properties

|            |                            | Specific activity (U/mg) <sup>a</sup> |             |             |
|------------|----------------------------|---------------------------------------|-------------|-------------|
|            |                            | WT                                    | E265V/S267W | M6          |
| Optimum T  | 25 °C                      | 52.0 ±1.4                             | 112.7 ±3.6  | 87.2 ±3.0   |
|            | 30 °C                      | 69.7 ±2.5                             | 171.9 ±7.1  | 136.4 ±5.2  |
|            | 35 °C                      | 97.5 ±3.6                             | 202.1 ±10.1 | 179.9 ±6.8  |
|            | 40 °C                      | 66.1 ±1.6                             | 156.4 ±8.6  | 229.1 ±3.5  |
|            | 45 °C                      | 33.1 ±1.0                             | 85.5 ±2.4   | 252.2 ±9.4  |
|            | 50 °C                      | 16.5 ±0.5                             | 52.5 ±1.4   | 215.7 ±7.0  |
| Optimum pH | Phosphate buffer (7.0)     | 36.3±1.7                              | 79.2±3.3    | 86.2±3.2    |
|            | Phosphate buffer (7.5)     | 56.6±2.4                              | 121.1±5.5   | 134.2±3.4   |
|            | Phosphate buffer (8.0)     | 93.0±3.8                              | 188.4±9.0   | 166.2 ± 4.1 |
|            | Tris-HCl buffer (8.0)      | 97.5 ± 3.5                            | 202.1 ± 9.4 | 179.9 ± 6.1 |
|            | Tris-HCl buffer (8.5)      | 81.9 ± 3.7                            | 169.3 ± 8.0 | 197.2 ± 8.4 |
|            | Tris-HCl buffer (9.0)      | 72.0 ± 2.9                            | 145.7 ± 2.6 | 182.8 ± 7.7 |
|            | Glycine-NaOH buffer (9.0)  | 68.2 ± 1.4                            | 150.3 ± 2.4 | 170.0 ± 2.9 |
|            | Glycine-NaOH buffer (9.05) | 45.2 ± 2.6                            | 114.0 ± 5.8 | 146.0 ± 6.3 |

<sup>a</sup>Mean ± standard deviation

**Table S5** Studies on the activity and/or thermostability of fungal lipases

| Organism                   | Variant(s)                           | Strategy                                             | Modification                   |                                     | Reference          |
|----------------------------|--------------------------------------|------------------------------------------------------|--------------------------------|-------------------------------------|--------------------|
|                            |                                      |                                                      | Thermostability                | Catalytic activity                  |                    |
| <i>Aspergillus oryzae</i>  | V269D                                | Structure-guided rational design                     | same $T_{opt}$                 | 6-fold increase in activity         | Lan et al., 2021   |
| <i>Rhizopus chinensis</i>  | Disulfide variant                    | Rational design                                      | same $T_{opt}$                 | Altered specificity                 | Yu et al., 2012    |
| <i>Rhizopus chinensis</i>  | S4-3                                 | Rational design                                      | 2 °C increase in $T_{opt}$     | Similar activity                    | Yu et al., 2012    |
| <i>Yarrowia lipolytica</i> | V213P                                | MD simulations                                       | 5 °C increase in $T_{opt}$     | Same activity (876.5 U/mg)          | Zhang et al., 2019 |
| <i>Rhizomucor miehei</i>   | T18K/T22I/E230I/S56C-N63C/V189C-D238 | Rosetta ddg_monomer MODIP, DbD, SSBOND, BridgeD      | 15 °C increase in $T_{opt}$    | 0.4-fold increase in activity       | Li et al., 2018    |
| <i>Rhizopus oryzae</i>     | V209L/D262G/E190C/E238C              | Multiple sequence alignment<br>Disulfide bond design | 15 °C increase in $T_{opt}$    | -                                   | Zhao et al., 2018  |
| <i>Rhizopus oryzae</i>     | P210F/L258F                          | Multiple alignment                                   | 10–20 °C decrease in $T_{opt}$ | 6.2-fold increase in activity       | Ding et al., 2019  |
| <i>Rhizopus oryzae</i>     | E190V                                | Error-prone PCR<br>DNA shuffling                     | 10 °C increase in $T_{opt}$    | 75% of the WT in activity           | Niu et al., 2006   |
| <i>Rhizopus oryzae</i>     | E265V/S267W/S61C-S115C/E190C-E238C   | This study                                           | 10 °C increase in $T_{opt}$    | (1.5–3.8)-fold increase in activity | This study         |

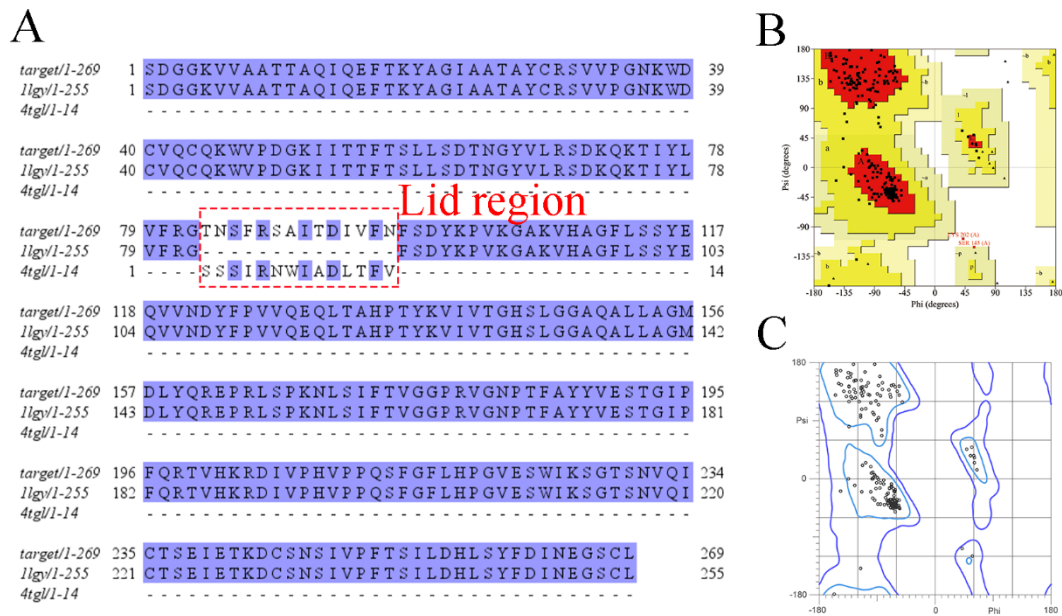

**Fig. S1** Model and evaluation of ROL in open conformation (OROL). (A) Multiple sequence alignments of target sequence, lid region of RML in open conformation (PDB ID: 4tgl, residues 82–95) and closed conformation of ROL without lid region (PDB ID: 1lgy, residues 1–82 and 97–269). The alignments were conducted using the PROMALS3D server and visualized using Jalview, with coloring based on the percentage identity. Ramachandran plot analysis of targeted OROL from (B) MolProbity and (C) PROCHECK.

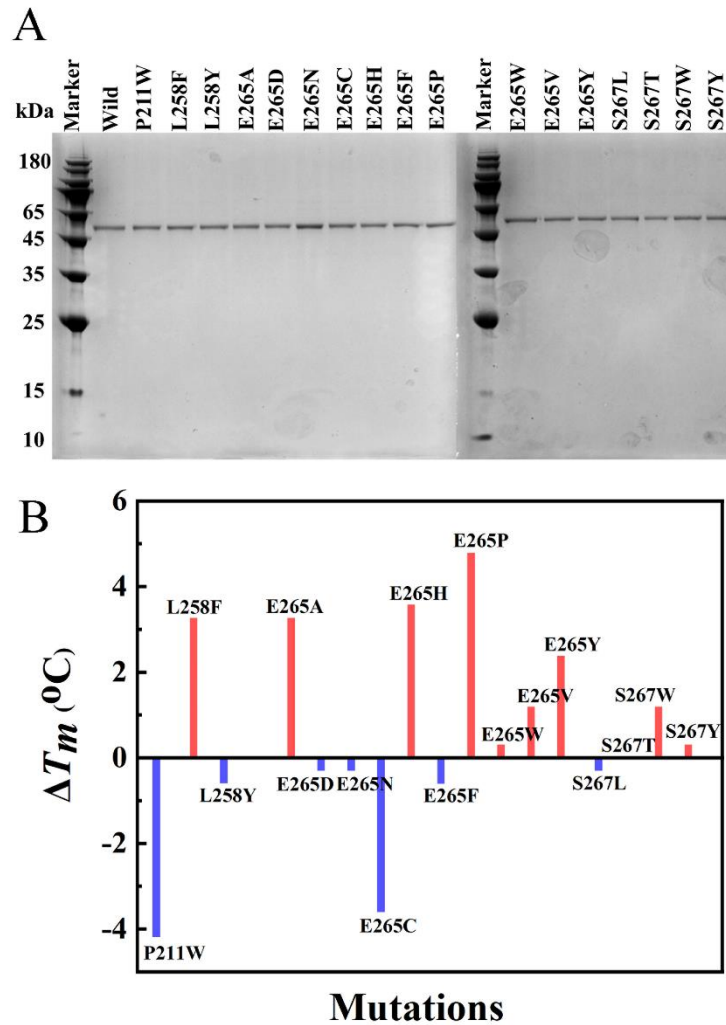

**Fig. S2** (A) SDS-PAGE image of purified variants based on Cartesian\_ddg using 12% separation gel and 5% stacking gel. (B) Melting temperature changes ( $\Delta T_m$ ) of purified variants based on Cartesian\_ddg measured by differential scanning fluorimetry. The red bar represents stable candidates with positive  $\Delta T_m$  value and the blue one represents unstable candidates with negative  $\Delta T_m$  value.

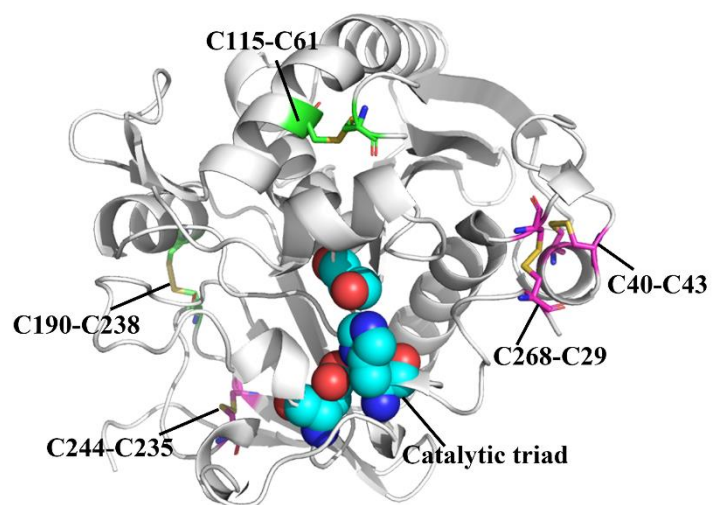

**Fig. S3** Presentation of disulfide bonds of mutant M6 with the catalytic triad as spheres in cyan. The designed disulfide bonds were as sticks in green and the native disulfide bonds were as sticks in magenta.

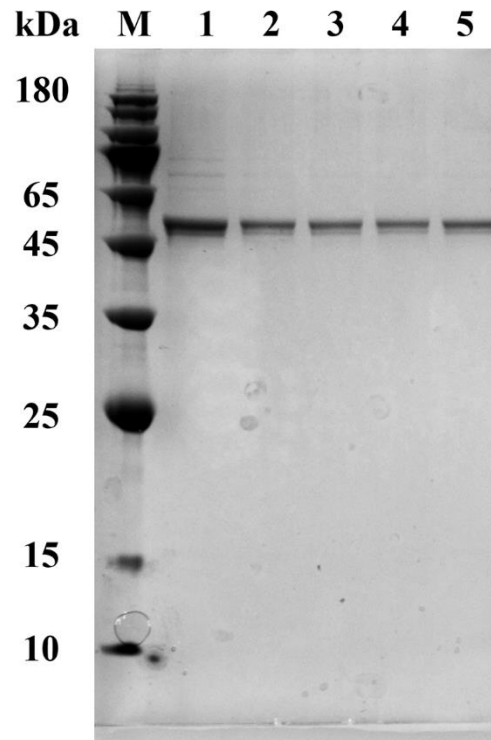

**Fig. S4** SDS-PAGE image of disulfide bond mutants using 12% separation gel and 5% stacking gel. (M: marker; 1: WT; 2: E265V/S267W; 3: E265V/S267W/E190C-E238C; 4: E265V/S267W/S61C-S115C; 5: M6).

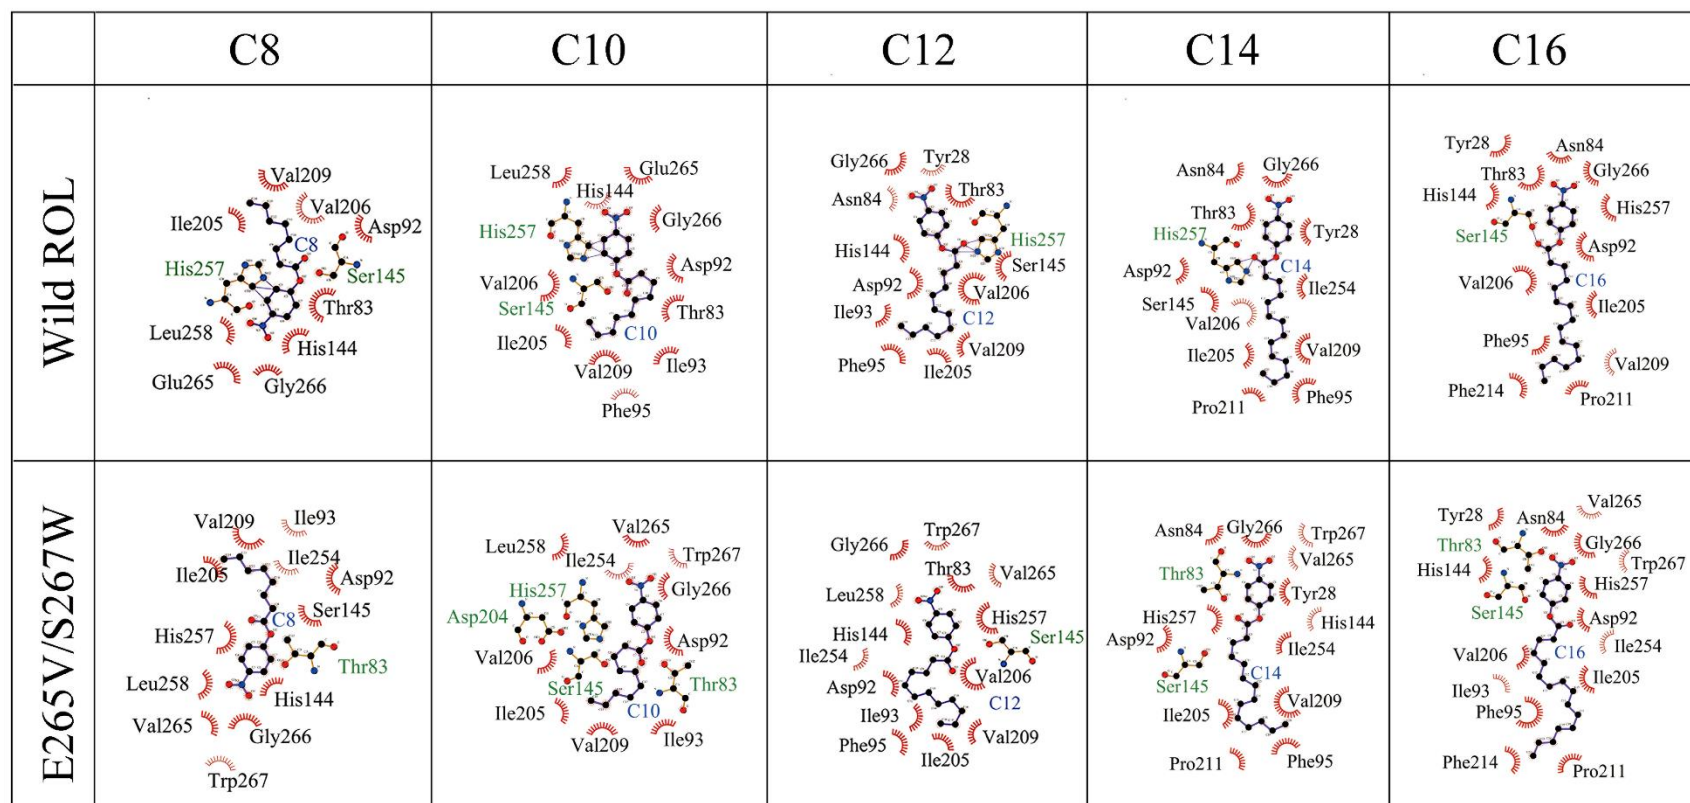

**Fig. S5** 2D diagrams of enzyme–substrate interactions of five bound ligands generated by LigPlot+, and plot of variant E265V/S267W automatically fitted to WT. The ligands are: C8, C10, C12, C14, and C16. The spoked arcs represent residues making nonbonded contacts with the ligand.



## References

- Ding X, Tang XL, Zheng RC, Zheng YG. 2019. Identification and engineering of the key residues at the crevice-like binding site of lipases responsible for activity and substrate specificity. *Biotechnol Lett* 41:137-146.
- Lan DM, Zhao G, Holzmann N, Yuan SG, Wang J, Wang YH. 2021. Structure-guided rational design of a mono- and diacylglycerol lipase from *Aspergillus oryzae*: a single residue mutant increases the hydrolysis ability. *J Agric Food Chem* 69:5344-5352.
- Li GL, Fang XR, Su F, Chen Y, Xu L, Yan YJ. 2018. Enhancing the thermostability of *Rhizomucor miehei* lipase with a limited screening library by rational-design point mutations and disulfide bonds. *Appl Environ Microbiol* 84:e02129-17.
- Niu WN, Li ZP, Zhang DW, Yu MR, Tan TW. 2006. Improved thermostability and the optimum temperature of *Rhizopus arrhizus* lipase by directed evolution. *J Mol Catal B Enzym* 43:33-39.
- Yu XW, Tan NJ, Xiao R, Xu Y. 2012. Engineering a disulfide bond in the lid hinge region of *Rhizopus chinensis* lipase: increased thermostability and altered acyl chain length specificity. *PLoS One* 7:e46388.
- Yu XW, Wang R, Zhang M, Xu Y, Xiao R. 2012. Enhanced thermostability of a *Rhizopus chinensis* lipase by in vivo recombination in *Pichia pastoris*. *Microb Cell Fact* 11:102.
- Zhang HT, Sang JC, Zhang Y, Sun TW, Liu H, Yue R, Zhang J, Wang HK, Dai YJ, Lu FJ, Liu FF. 2019. Rational design of a *Yarrowia lipolytica* derived lipase for improved thermostability. *Int J Biol Macromol* 137:1190-1198.
- Zhao JF, Wang Z, Gao FL, Lin JP, Yang LR, Wu MB. 2018. Enhancing the thermostability of *Rhizopus oryzae* lipase by combined mutation of hot-spots

and engineering a disulfide bond. RSC Adv 8:41247-41254.
